# Supplementary material for: Mycobacterium ulcerans Ecological Dynamics and Its Association with Freshwater Ecosystems and Aquatic Communities: Results from a 12-Month Environmental Survey in Cameroon
Source: PubMed Central journal article supplement (PMC4022459; doi:10.1371/journal.pntd.0002879), 2014-05-15
Supplement: pntd.0002879.s007.pdf [file pntd.0002879.s007.pdf]

**Table S1. Overall abundance of aquatic vertebrates and macro-invertebrates at the lowest classification level achieved.** Results are given for Akonolinga (12 months of sampling) and Bankim (4 months of sampling). Abundance indicates total number of individual organisms collected of each taxonomic group.

|                      | Higher Classification | Order          | Stage   | Family         | Akonolinga | Bankim | Total |
|----------------------|-----------------------|----------------|---------|----------------|------------|--------|-------|
| <b>Vertebrates</b>   | Fish                  |                | Adult   |                | 600        | 289    | 889   |
|                      |                       |                | Fry     |                | 501        | 180    | 681   |
|                      | Anura                 |                | Adult   |                | 14         | 0      | 14    |
|                      |                       |                | Tadpole |                | 5802       | 1423   | 7225  |
| <b>Invertebrates</b> | Insecta               | Odonata        | Larvae  | Anisoptera*    | 13013      | 1934   | 14947 |
|                      |                       |                |         | Zygoptera*     | 10502      | 3888   | 14390 |
|                      |                       | Ephemeroptera  | Larvae  | Baetidae       | 38335      | 4668   | 43003 |
|                      | Caenidae              |                |         | 3022           | 466        | 3488   |       |
|                      | Heptageniidae         |                |         | 1336           | 89         | 1425   |       |
|                      | Leptophlebiidae       |                |         | 1181           | 186        | 1367   |       |
|                      |                       | Hemiptera      | Adult   | Belostomatidae | 1547       | 156    | 1703  |
|                      | Naucoridae            |                |         | 237            | 76         | 313    |       |
|                      | Hydrometridae         |                |         | 490            | 76         | 566    |       |
|                      | Nepidae               |                |         | 730            | 311        | 1041   |       |
|                      | Corixidae             |                |         | 550            | 221        | 771    |       |
|                      | Notonectidae          |                |         | 2490           | 805        | 3295   |       |
|                      | Pleidae               |                |         | 6996           | 150        | 7146   |       |
|                      | Gerridae              |                |         | 573            | 307        | 880    |       |
|                      | Mesoveliidae          |                |         | 1187           | 460        | 1647   |       |
|                      | Saldidae              |                |         | 74             | 12         | 86     |       |
|                      | Veliidae              |                |         | 186            | 93         | 279    |       |
|                      | Hebridae              |                |         | 9              | 1          | 10     |       |
|                      | Leptopodidae          |                |         | 37             | 2          | 39     |       |
|                      |                       |                |         | Unknown        | 0          | 12     | 12    |
|                      |                       | Hemiptera      | Larvae  | Belostomatidae | 2059       | 410    | 2469  |
|                      |                       |                |         | Naucoridae     | 85         | 32     | 117   |
|                      |                       |                |         | Others         | 69         | 5      | 74    |
|                      |                       | Coleoptera     | Adult   | Dytiscidae     | 6879       | 583    | 7462  |
|                      |                       |                |         | Hydrophilidae  | 15355      | 464    | 15819 |
|                      |                       |                |         | Curculionidae  | 56         | 5      | 61    |
|                      |                       |                |         | Gyrinidae      | 42         | 30     | 72    |
|                      |                       |                |         | Noteridae      | 26740      | 2563   | 29303 |
|                      |                       |                |         | Staphilinidae  | 171        | 34     | 205   |
|                      |                       |                |         | Chrisomelidae  | 54         | 22     | 76    |
|                      |                       |                |         | Haliplidae     | 184        | 7      | 191   |
|                      |                       |                |         | Lampiridae     | 0          | 3      | 3     |
|                      |                       |                |         | Carabidae      | 172        | 13     | 185   |
|                      |                       |                |         | Elmidae        | 186        | 40     | 226   |
|                      |                       |                |         | Dryopidae      | 21         | 9      | 30    |
|                      |                       |                |         | Hydrochidae    | 43         | 21     | 64    |
|                      |                       | Spercheidae    | 28      | 1              | 29         |        |       |
|                      |                       | Torridicolidae | 6       | 1              | 7          |        |       |

Table S1. (cont.)

|               | Higher Classification | Order       | Stage                  | Family      | Akonolinga          | Bankim       | Total         |       |
|---------------|-----------------------|-------------|------------------------|-------------|---------------------|--------------|---------------|-------|
| Invertebrates | Insecta               | Coleoptera  | Adult                  | Hydraenidae | 2                   | 0            | 2             |       |
|               |                       |             |                        | Unknown     | 233                 | 38           | 271           |       |
|               |                       |             |                        | Larvae      | Scirtidae           | 874          | 134           | 1008  |
|               |                       |             |                        |             | Dityscidae          | 1481         | 218           | 1699  |
|               |                       |             |                        |             | Haliplidae          | 152          | 4             | 156   |
|               |                       |             |                        |             | Lampiridae          | 11           | 1             | 12    |
|               |                       |             |                        |             | Unknown (with jaws) | 2019         | 737           | 2756  |
|               |                       |             | Unknown (without jaws) |             | 1642                | 415          | 2057          |       |
|               |                       |             | Diptera                | Larvae      | Chironomidae        | 20626        | 6757          | 27383 |
|               |                       |             |                        |             | Culicidae           | 4360         | 599           | 4959  |
|               |                       |             |                        |             | Ceratopogonidae     | 1970         | 1463          | 3433  |
|               |                       |             |                        |             | Tipulidae           | 153          | 45            | 198   |
|               |                       |             |                        |             | Tabanidae           | 86           | 10            | 96    |
|               |                       |             |                        |             | Chaoboridae         | 1136         | 54            | 1190  |
|               | Empididae             | 14          |                        |             | 7                   | 21           |               |       |
|               | Simuliidae            | 80          |                        |             | 55                  | 135          |               |       |
|               | Syrphidae             | 17          |                        |             | 28                  | 45           |               |       |
|               | Ephydriidae           | 5           |                        |             | 2                   | 7            |               |       |
|               | Psychodidae           | 45          |                        |             | 1                   | 46           |               |       |
|               | Dolichopodidae        | 12          |                        |             | 2                   | 14           |               |       |
|               | Dixidae               | 3           |                        |             | 4                   | 7            |               |       |
|               | Mollusca              | Gastropoda  | Pupae                  | Muscidae    | 16                  | 2            | 18            |       |
|               |                       |             |                        | Sciomyzidae | 3                   | 3            | 6             |       |
|               |                       |             |                        | Unknown     | 119                 | 19           | 138           |       |
|               |                       |             |                        |             | 2334                | 942          | 3276          |       |
|               |                       |             |                        |             | 2958                | 290          | 3248          |       |
|               |                       | Plecoptera  | Larvae                 |             | 28                  | 4            | 32            |       |
|               | Lepidoptera           | Larvae      |                        | 372         | 126                 | 498          |               |       |
|               | Bivalvia              |             |                        | 1410        | 1700                | 3110         |               |       |
|               | Decapoda              |             |                        | 1612        | 1012                | 2624         |               |       |
| Crustacea     | Dendrobranchiata      |             |                        | 7748        | 191                 | 7939         |               |       |
|               |                       | Pleocyemata |                        | 15          | 4                   | 19           |               |       |
|               | Cladocera             |             |                        | 947         | 279                 | 1226         |               |       |
| Annelida      | Hirudinea**           |             |                        | 373         | 97                  | 470          |               |       |
|               | Oligochaeta**         |             |                        | 1342        | 552                 | 1894         |               |       |
| Arachnida     | Acari                 |             | Hydracarina            | 1780        | 274                 | 2054         |               |       |
|               | Araneae               |             |                        | 2655        | 868                 | 3523         |               |       |
|               | Collembola            |             |                        | 514         | 107                 | 621          |               |       |
| <b>Total</b>  |                       |             |                        |             | <b>200709</b>       | <b>37092</b> | <b>237801</b> |       |

\* Suborder; \*\*Subclass
