# Supplementary material for: Mycobacterium ulcerans Ecological Dynamics and Its Association with Freshwater Ecosystems and Aquatic Communities: Results from a 12-Month Environmental Survey in Cameroon
Source: PubMed Central journal article supplement (PMC4022459; doi:10.1371/journal.pntd.0002879), 2014-05-15
Supplement: pntd.0002879.s008.pdf [file pntd.0002879.s008.pdf]

**Table S2. Total and relative abundance of aquatic vertebrates and macro-invertebrates in aquatic ecosystems.** Results are given for Akonolinga (12 months of sampling) and Bankim (4 months of sampling). Total abundance indicates total number of individual organisms collected of each taxonomic group in a given ecosystem. Relative abundance (in brackets) indicates the percentage of individuals from each ecosystem belonging to that taxonomic group.

|                      |            | Akonolinga    |              |             |              | Bankim       |             |             |             |
|----------------------|------------|---------------|--------------|-------------|--------------|--------------|-------------|-------------|-------------|
|                      |            | River         | Flooded Area | Swamp       | Stream       | Flooded Area | Swamp       | Stream      |             |
| <b>Vertebrates</b>   | Fish       | 428 (0.9)     | 2 (0)        | 298 (0.3)   | 373 (0.9)    | 119 (0.9)    | 108 (0.8)   | 242 (2.6)   |             |
|                      | Anura      | 2319 (4.6)    | 23 (0.1)     | 2533 (2.7)  | 941 (2.3)    | 76 (0.6)     | 1151 (8.4)  | 196 (2.1)   |             |
| <b>Invertebrates</b> | Insecta    | Odonata       | 1878 (3.8)   | 868 (4.7)   | 15663 (16.5) | 5106 (12.7)  | 1636 (12.5) | 2430 (17.8) | 1756 (18.8) |
|                      |            | Ephemeroptera | 8640 (17.3)  | 9979 (53.8) | 17057 (17.9) | 8198 (20.4)  | 3648 (27.9) | 581 (4.2)   | 1180 (12.6) |
|                      |            | Hemiptera     | 6746 (13.5)  | 1635 (8.8)  | 6497 (6.8)   | 2441 (6.1)   | 1257 (9.6)  | 928 (6.8)   | 944 (10.1)  |
|                      |            | Coleoptera    | 22180 (44.4) | 2633 (14.2) | 29549 (31.1) | 1989 (4.9)   | 2073 (15.8) | 2493 (18.2) | 777 (8.3)   |
|                      |            | Diptera       | 5287 (10.6)  | 2654 (14.3) | 17392 (18.3) | 5646 (14)    | 3684 (28.2) | 3918 (28.6) | 2391 (25.6) |
|                      |            | Trichoptera   | 168 (0.3)    | 10 (0.1)    | 532 (0.6)    | 2248 (5.6)   | 32 (0.2)    | 15 (0.1)    | 243 (2.6)   |
|                      |            | Plecoptera    | 3 (0)        | 3 (0)       | 4 (0)        | 18 (0)       | 0 (0)       | 2 (0)       | 2 (0)       |
|                      |            | Lepidoptera   | 64 (0.1)     | 60 (0.3)    | 116 (0.1)    | 132 (0.3)    | 10 (0.1)    | 33 (0.2)    | 83 (0.9)    |
|                      | Mollusca   | Gastropoda    | 214 (0.4)    | 46 (0.2)    | 1440 (1.5)   | 3115 (7.7)   | 95 (0.7)    | 1203 (8.8)  | 255 (2.7)   |
|                      |            | Bivalvia      | 47 (0.1)     | 0 (0)       | 92 (0.1)     | 133 (0.3)    | 0 (0)       | 1 (0)       | 0 (0)       |
|                      | Crustacea  | Decapoda      | 199 (0.4)    | 5 (0)       | 12 (0)       | 7547 (18.8)  | 0 (0)       | 0 (0)       | 195 (2.1)   |
|                      |            | Cladocera     | 451 (0.9)    | 11 (0.1)    | 458 (0.5)    | 27 (0.1)     | 8 (0.1)     | 258 (1.9)   | 13 (0.1)    |
|                      | Annelida   | Hirudinea     | 214 (0.4)    | 114 (0.6)   | 613 (0.6)    | 893 (2.2)    | 52 (0.4)    | 142 (1)     | 487 (5.2)   |
|                      |            | Oligochaeta   | 168 (0.3)    | 262 (1.4)   | 266 (0.3)    | 353 (0.9)    | 19 (0.1)    | 75 (0.5)    | 31 (0.3)    |
|                      | Arachnida  | Acari         | 523 (1)      | 75 (0.4)    | 1073 (1.1)   | 109 (0.3)    | 155 (1.2)   | 28 (0.2)    | 91 (1)      |
|                      |            | Araneae       | 407 (0.8)    | 134 (0.7)   | 1368 (1.4)   | 746 (1.9)    | 189 (1.4)   | 291 (2.1)   | 388 (4.2)   |
|                      | Collembola |               | 66 (0.1)     | 19 (0.1)    | 195 (0.2)    | 234 (0.6)    | 31 (0.2)    | 20 (0.1)    | 56 (0.6)    |
