# Supplementary material for: Mycobacterium ulcerans Ecological Dynamics and Its Association with Freshwater Ecosystems and Aquatic Communities: Results from a 12-Month Environmental Survey in Cameroon
Source: PubMed Central journal article supplement (PMC4022459; doi:10.1371/journal.pntd.0002879), 2014-05-15
Supplement: pntd.0002879.s009.pdf [file pntd.0002879.s009.pdf]

**Table S3. Detection of *M. ulcerans* DNA by qPCR with KR and IS2404 sequences.** Results are given for pools of aquatic vertebrates and invertebrates from Akonolinga (12 months of sampling) and Bankim (4 months of sampling). All pools were tested for the KR sequence. KR positive pools were then confirmed by IS2404. Only pools positive to both sequences were considered positive.

|                      |                     | Akonolinga    |              |               | Bankim        |              |               |
|----------------------|---------------------|---------------|--------------|---------------|---------------|--------------|---------------|
|                      |                     | KR+ / Total   | IS24+ / KR+  | KR+ & IS24+ / | KR+ / Total   | IS24+ / KR+  | KR+ & IS24+ / |
| <b>Vertebrates</b>   | Fish                | 9/66 (13.6)   | 6/9 (66.7)   | 6/66 (9.1)    | 6/57 (10.5)   | 5/6 (83.3)   | 5/57 (8.8)    |
|                      | Anura               | 8/102 (7.8)   | 6/8 (75)     | 6/102 (5.9)   | 7/47 (14.9)   | 4/7 (57.1)   | 4/47 (8.5)    |
| <b>Invertebrates</b> | Insecta             |               |              |               |               |              |               |
|                      | Odonata             | 29/242 (12)   | 18/29 (62.1) | 18/242 (7.4)  | 16/120 (13.3) | 16/16 (100)  | 16/120 (13.3) |
|                      | Ephemeroptera       | 26/239 (10.9) | 12/26 (46.2) | 12/239 (5)    | 15/118 (12.7) | 14/15 (93.3) | 14/118 (11.9) |
|                      | Hemiptera           | 39/263 (14.8) | 32/39 (82.1) | 32/263 (12.2) | 13/133 (9.8)  | 13/13 (100)  | 13/133 (9.8)  |
|                      | Coleoptera (Adults) | 20/238 (8.4)  | 8/20 (40)    | 8/238 (3.4)   | 13/115 (11.3) | 11/13 (84.6) | 11/115 (9.6)  |
|                      | Coleoptera (Larvae) | 5/84 (6)      | 5/5 (100)    | 5/84 (6)      | 8/76 (10.5)   | 6/8 (75)     | 6/76 (7.9)    |
|                      | Diptera             | 30/269 (11.2) | 24/30 (80)   | 24/269 (8.9)  | 18/144 (12.5) | 15/18 (83.3) | 15/144 (10.4) |
|                      | Trichoptera         | 1/70 (1.4)    | 0/1 (0)      | 0/70 (0)      | 0/19 (0)      | 0/0 (0)      | 0/19 (0)      |
|                      | Plecoptera          | 0/0           | 0/0          | 0/0           | 1/2 (50)      | 1/1 (100)    | 1/2 (50)      |
|                      | Lepidoptera         | 1/20 (5)      | 1/1 (100)    | 1/20 (5)      | 6/24 (25)     | 5/6 (83.3)   | 5/24 (20.8)   |
|                      | Mollusca            | 8/67 (11.9)   | 4/8 (50)     | 4/67 (6)      | 3/83 (3.6)    | 1/3 (33.3)   | 1/83 (1.2)    |
|                      | Crustacea           |               |              |               |               |              |               |
|                      | Decapoda            | 3/45 (6.7)    | 3/3 (100)    | 3/45 (6.7)    | 0/2 (0)       | 0/0 (0)      | 0/2 (0)       |
|                      | Cladocera           | 0/10 (0)      | 0/0 (0)      | 0/10 (0)      | 2/11 (18.2)   | 2/2 (100)    | 2/11 (18.2)   |
|                      | Annelida            | 4/60 (6.7)    | 4/4 (100)    | 4/60 (6.7)    | 11/62 (17.7)  | 11/11 (100)  | 11/62 (17.7)  |
|                      | Arachnida           |               |              |               |               |              |               |
|                      | Acari               | 4/59 (6.8)    | 3/4 (75)     | 3/59 (5.1)    | 0/48 (0)      | 0/0 (0)      | 0/48 (0)      |
|                      | Araneae             | 9/81 (11.1)   | 5/9 (55.6)   | 5/81 (6.2)    | 5/79 (6.3)    | 4/5 (80)     | 4/79 (5.1)    |
|                      | Collembola          | 0/16 (0)      | 0/0 (0)      | 0/16 (0)      | 0/12 (0)      | 0/0 (0)      | 0/12 (0)      |
