# Supplementary material for: Mycobacterium ulcerans Ecological Dynamics and Its Association with Freshwater Ecosystems and Aquatic Communities: Results from a 12-Month Environmental Survey in Cameroon
Source: PubMed Central journal article supplement (PMC4022459; doi:10.1371/journal.pntd.0002879), 2014-05-15
Supplement: pntd.0002879.s010.pdf [file pntd.0002879.s010.pdf]

**Table S4: Distribution of *M. ulcerans* positive macro-invertebrates and vertebrates over space and time.** Values indicate the number of sites and months where a taxonomic group has been found positive to *M. ulcerans* DNA by both IS2404 and KR out of the total number of sites and months where the group has been tested.

|                      |           |                     | Sites positive/Sites tested (%) | Months positive/Months tested (%) |           |
|----------------------|-----------|---------------------|---------------------------------|-----------------------------------|-----------|
| <b>Vertebrates</b>   | Fish      |                     | 6/27 (22)                       | 6/12 (50)                         |           |
|                      | Anura     |                     | 6/20 (30)                       | 5/12 (42)                         |           |
| <b>Invertebrates</b> | Insecta   | Odonata             | 16/32 (50)                      | 8/12 (67)                         |           |
|                      |           | Ephemeroptera       | 12/32 (38)                      | 7/12 (58)                         |           |
|                      |           | Hemiptera           | 21/32 (66)                      | 11/12 (92)                        |           |
|                      |           | Coleoptera (Adults) | 10/32 (31)                      | 6/12 (50)                         |           |
|                      |           | Coleoptera (Larvae) | 5/16 (31)                       | 4/5 (80)                          |           |
|                      |           | Diptera             | 19/32 (59)                      | 9/12 (75)                         |           |
|                      |           | Trichoptera         | 0/17 (0)                        | 0/12 (0)                          |           |
|                      |           | Plecoptera          | 1/1 (100)                       | 1/1 (100)                         |           |
|                      |           | Lepidoptera         | 3/13 (23)                       | 2/5 (40)                          |           |
|                      |           | Mollusca            |                                 | 3/24 (13)                         | 3/12 (25) |
|                      |           | Crustacea           | Decapoda                        | 1/8 (13)                          | 2/11 (18) |
|                      |           |                     | Cladocera                       | 1/7 (14)                          | 1/2 (50)  |
|                      |           | Annelida            |                                 | 8/19 (42)                         | 5/11 (45) |
|                      |           | Arachnida           | Acari                           | 1/14 (7)                          | 2/8 (25)  |
| Araneae              | 5/21 (24) |                     | 4/9 (44)                        |                                   |           |
| Collembola           |           | 0/11 (0)            | 0/4 (0)                         |                                   |           |
